# Supplementary material
Source: PubMed Central journal article supplement (PMC7161464)
Supplement: jcsm.16.4.619.SD1.pdf [file jcsm.16.4.619.SD1.pdf]

## REVIEWED STUDIES

- Allison K, Wrotniak B, Paré E, Sarwer D. Psychosocial Characteristics and gestational weight change among overweight, african american pregnant women. *Obstet Gynecol Int J.* 2012;1-9.
- Babaie N, & Purhashemi S. Investigating the relationship between mental health and insomnia in pregnant women referred to health centers in Estahban. *Makara Journal of Health Research*, 2015;19(3):87-91.
- Chang M-W, Brown R, Nitzke S, Smith B, Eghtedary K. Stress, sleep, depression and dietary intakes among low-income overweight and obese pregnant women. *Matern Child Health J.* 2015;19(5):1047-1059.
- Coo S, Milgrom J, & Trinder J. Mood and objective and subjective measures of sleep during late pregnancy and the postpartum period. *Behav Sleep Med.* 2014;12(4):317-330.
- D'Anna-Hernandez K, Garcia E, Coussons-Read M, Laudenslager M, Ross R. Sleep moderates and mediates the relationship between acculturation and depressive symptoms in pregnant Mexican-American women. *Matern Child Health J.* 2016;20(2):422-433.
- Dorheim S, Bjorvatn B, Eberhard-Gran M. Insomnia and depressive symptoms in late pregnancy: a population-based study. *Behav Sleep Med.* 2012;10:152-166.
- Field T, Diego M, Hernandez-Reif M, Figueiredo B, Schanberg S, & Kuhn C. Sleep disturbances in depressed pregnant women and their newborns. *Infant Behav Dev.* 2007;30(1):127-133.
- Hall W, Hauck Y, Carty E, Hutton E, Fenwick J, Stoll K. Childbirth fear, anxiety, fatigue, and sleep deprivation in pregnant women. *J Obstet Neonatal Nurs.* 2009;38(5):567-576.
- Hung H, Tsai P, Ko S, Chen C. Patterns and predictors of sleep quality in Taiwanese pregnant women. *MCN Am J Matern Child Nurs.* 2013;38(2):95-101.
- Hux,V, Roberts J, Okun M. Allostatic load in early pregnancy is associated with poor sleep quality. *Sleep Med.* 2017;33:85-90.

- Kamysheva E, Skouteris H, Wertheim E, Paxton S, Milgrom J. Examination of a multi-factorial model of body-related experiences during pregnancy: the relationships among physical symptoms, sleep quality, depression, self-esteem, and negative body attitudes. *Body Image*. 2008;2:152–163
- Kamysheva E, Skouteris H, Wertheim E, Paxton S, Milgrom J. A prospective investigation of the relationships among sleep quality, physical symptoms, and depressive symptoms during pregnancy. *J Affect Disord*. 2010;123(1-3):317-320.
- Li G, Kong L, Zhou H, Kang X, Fang Y, Li P. Relationship between prenatal maternal stress and sleep quality in Chinese pregnant women: the mediation effect of resilience. *Sleep Med*. 2016;25:8-12.
- Matthews J. Interest in alternative approaches for gestational weight gain and maternal stress management during pregnancy: A survey. Thesis. 2015.
- Mirghaforvand M, Mohammad-Alizadeh-Charandabi S, Zarei S, Effati-Daryani F, Sarand F. The relationship between depression and sleep quality in Iranian pregnant women. *International Journal of Womens Health and Reproduction Sciences*, 2017;5(2):147-152.
- Mourady D, Richa S, Karam R, Papazian T, Moussa, F. H., El Osta N, Kesrouani A, et al. Associations between quality of life, physical activity, worry, depression and insomnia: A cross-sectional designed study in healthy pregnant women. *PLoS One*. 2017;12(5).
- Qiu C, Gelaye B, Zhong Q, Enquobahrie D, Frederick I, & Williams M. Construct validity and factor structure of the Pittsburgh Sleep Quality Index among pregnant women in a Pacific-Northwest cohort. *Sleep Breath*. 2016;20(1):293-301.
- Rallis S, Skouteris H, McCabe M, Milgrom, J. A prospective examination of depression, anxiety and stress throughout pregnancy. *Women Birth*. 2014;27(4):e36-42.
- Reshadat S, Zakiei A, Karami J. & Ahmadi E. A study of the psychological and family factors associated with sleep quality among pregnant women. *Sleep Hypn*. 2018;20(1):17-24.

- Simpson W, Frey B, Steiner M. Mild depressive symptoms during the third trimester of pregnancy are associated with disruptions in daily rhythms but not subjective sleep quality. *J Womens Health (Larchmt)*. 2016;25(6):594-598.
- Skouteris H, Germano C, Wertheim E, Paxton S, Milgrom J. Sleep quality and depression during pregnancy: a prospective study. *J Sleep Res*. 2008;17(2):217-220.
- Skouteris H, Wertheim E, Germano C, Paxton S, Milgrom J. Assessing sleep during pregnancy a study across two time points examining the Pittsburgh Sleep Quality Index and associations with depressive symptoms. *Womens Health Issues*, 2009;19(1):45-51.
- Skouteris H, Wertheim E, Railis S, Milgrom J, Paxton S. (2009). Depression and anxiety through pregnancy and the early postpartum: An examination of prospective relationships. *J of Affect Disord*. 2009;113(3):303-308.
- Swanson L, Pickett S, Flynn H, Armitage, R. Relationships among depression, anxiety, and insomnia symptoms in perinatal women seeking mental health treatment. *J Womens Health (Larchmt)*. 2011;20:553-558
- Tsai S, Lin J, Wu W, Lee C, Lee P. Sleep disturbances and symptoms of depression and daytime sleepiness in pregnant women. *Birth: Issues in Prenatal Care*. 2016;43(2):176-183.
- Tsai S, Lee C, Wu W, Landis C. Sleep hygiene and sleep quality of third-trimester pregnant women. *Res Nurs Health*. 2016;39(1):57-65.
- van der Zwan J, de Vente W, Tolvanen M, Karlsson H, Buil J, Koot H, Paavonen E, et al. Longitudinal associations between sleep and anxiety during pregnancy, and the moderating effect of resilience, using parallel process latent growth curve models. *Sleep Med*. 2017;40:63-68.

- Volkovich, E., Tikotzky, L., & Manber, R. (2016). Objective and subjective sleep during pregnancy: links with depressive and anxiety symptoms. *Arch Womens Ment Health*. 2016;19(1):173-181.
- Wolynczyk-Gmaj D, Rozanska-Waledziak A, Ziemka S, Ufnal M, Brzezicka A, Gmaj B, Januszko P, et al. Insomnia in pregnancy is associated with depressive symptoms and eating at night. *J Clinl Sleep Med*. 2017;13(10), 1171-1176.
- Yang Y, Mao J, Ye Z, Zeng X, Zhao H, Liu, Y, Li, J. (2018). Determinants of sleep quality among pregnant women in China: a cross-sectional survey. *J Matern Fetal Med*. 2018;31(22):2980-2985.
- Yu Y, Li M, Pu L, Wang S, Wu J, Ruan L, Jiang S, et al. Sleep was associated with depression and anxiety status during pregnancy: a prospective longitudinal study. *Arch Womens Ment Health*. 2017;20(5):695-701.
- Zhong Q, Gelaye B, Sanchez S, Williams M. Psychometric properties of the Pittsburgh Sleep Quality Index (PSQI) in a cohort of Peruvian pregnant women. *Journal of Clinical Sleep Med*. 2015;11(8):869-877.

Table S1. Evidence Table of Included Studies

| Author                         | Participants                                                        | Terms                                                 | Purpose/Study Design                                                                                                                                                                                                                                       | Measures                                                                                                                                  | Findings                                                                                                                                                                                                                           |
|--------------------------------|---------------------------------------------------------------------|-------------------------------------------------------|------------------------------------------------------------------------------------------------------------------------------------------------------------------------------------------------------------------------------------------------------------|-------------------------------------------------------------------------------------------------------------------------------------------|------------------------------------------------------------------------------------------------------------------------------------------------------------------------------------------------------------------------------------|
| Allison et al. (2012)          | 120 pregnant women<br>( <i>M</i> age = 25.2)<br>United States       | Sleep<br>Mood<br>Pregnancy                            | Examined the relationship between psychological factors and gestational weight gain among low socioeconomic status, African American, overweight pregnant women. Cross-sectional                                                                           | PSQI, EPDS                                                                                                                                | Sleep latency, sleep duration and sleep quality were significantly correlated with depressive symptoms.                                                                                                                            |
| Babaie et al. (2015)           | 182 pregnant women<br>( <i>M</i> age not reported)<br>Iran          | Insomnia<br>Mental health<br>Pregnant women           | Investigated the relationship between mental health and insomnia in pregnant women. Cross-sectional; descriptive-analytic                                                                                                                                  | GHQ-28 (depression, anxiety subscales), ISI                                                                                               | Anxiety and depression were significantly correlated with insomnia.                                                                                                                                                                |
| Chang et al. (2015)            | 213 pregnant women<br>( <i>M</i> age not reported)<br>United States | Stress<br>Sleep<br>Depression<br>Pregnant women       | Investigated the mediating roles of sleep and depression on the relationships between stress, fat intake, and fruit and vegetable intake among low-income overweight and obese pregnant women by trimesters. Cross-sectional                               | PSS, PSQI, EDPS                                                                                                                           | Stress was not significantly correlated with any sleep variables. Depression was significantly correlated with sleep duration, sleep quality, sleep latency, and night time sleep disturbances.                                    |
| Coo et al. (2014)              | 29 pregnant women<br>( <i>M</i> age = 31.08)<br>Australia           | Pregnancy<br>Sleep<br>Depression<br>Anxiety<br>Stress | Examined the association between measures of objective sleep and subjective sleep to postpartum mood from the third trimester of pregnancy to 10 to 12 weeks postpartum. Longitudinal design but only used cross-sectional correlations at third trimester | PSQI, Wrist Actigraphy for 7 days, EDPS, HADS, and DASS-21<br><br>Measured during the third trimester. Mean gestational age = 29.64 weeks | Nighttime sleep measured with Actigraphy and sleep quality measured by the PSQI had no significant associations with mood. PSQI and DASS (depression and stress), and HADS (anxiety and depression) were significantly associated. |
| D'Anna-Hernandez et al. (2016) | 60 pregnant women<br>( <i>M</i> age = 28.2)<br>United States        | Pregnancy<br>Mother<br>Perinatal<br>Mood              | Explored the relationship between daily sleep measures and depressive symptoms. Cross-sectional and longitudinal                                                                                                                                           | EDPS, Sleep diaries (minutes to fall asleep, times woke during the night, bed and wake times, and total hours slept).                     | Depressive symptoms were only significantly correlated with times woke during the night.                                                                                                                                           |

|                       |                                                       |                                           |                                                                                                                                                                                                                          |                                                                                                                         |                                                                                                                                                                                                                                                                                                                                                                                                                                                                                                                                                                                                           |
|-----------------------|-------------------------------------------------------|-------------------------------------------|--------------------------------------------------------------------------------------------------------------------------------------------------------------------------------------------------------------------------|-------------------------------------------------------------------------------------------------------------------------|-----------------------------------------------------------------------------------------------------------------------------------------------------------------------------------------------------------------------------------------------------------------------------------------------------------------------------------------------------------------------------------------------------------------------------------------------------------------------------------------------------------------------------------------------------------------------------------------------------------|
|                       |                                                       |                                           |                                                                                                                                                                                                                          | Measured at 17.3 ± 1.8 weeks, 28.1 ± 1.5 weeks, 34.3 ± 1.4 weeks.<br><br>Correlations were averaged across pregnancy    |                                                                                                                                                                                                                                                                                                                                                                                                                                                                                                                                                                                                           |
| Dorheim et al. (2012) | 2816 pregnant women (M age = 30.9) Norway             | Insomnia<br>Depression<br>Pregnancy       | Examined the prevalence of and risk factors for insomnia and depressive symptoms. Cross-sectional                                                                                                                        | BIS and EDPS                                                                                                            | EPDS had a significant positive association with BIS sub-score daytime impairment. Also, item 6 of EPDS (“Things have been getting on top of me”/coping) had a significant positive association with BIS sub-score daytime dysfunction.                                                                                                                                                                                                                                                                                                                                                                   |
| Field et al. (2007)   | 253 pregnant women (M age not reported) United States | Sleep disturbance<br>Maternal depression  | Explored the relationships between self-reported sleep disturbances and self-reported problems including depression, anxiety, and anger as well as stress indicators including norepinephrine and cortisol. Longitudinal | CES-D, STAI, VSH, urine assays<br><br>Measured at T1 G <sub>A</sub> M = 22.3 weeks and T2 G <sub>A</sub> M = 32.4 weeks | During the second trimester, women had high scores for sleep disturbances, depression, anxiety, norepinephrine and cortisol levels. At the third trimester, women had high scores for sleep disturbances, depression, anxiety and anger. Sleep disturbances at the second trimester were significantly correlated with depression, anxiety, and norepinephrine at the second trimester and anxiety and cortisol at the third trimester. Third trimester sleep disturbances were significantly correlated with second trimester depression, anxiety, and cortisol and at the third trimester with anxiety. |
| Hall et al. (2009)    | 650 pregnant women (M age = 31.5) United States       | Anxiety<br>Sleep Deprivation<br>Pregnancy | Examined women’s levels of childbirth fear, sleep deprivation, anxiety, and fatigue and their relationships during the third trimester of pregnancy. Cross-sectional                                                     | STAI – State and Mindell’s Sleep Questionnaire<br><br>Measured between 35-39 weeks gestation                            | Strong negative correlation between state anxiety and hours slept per night.                                                                                                                                                                                                                                                                                                                                                                                                                                                                                                                              |
| Hung et al. (2013)    | 400 pregnant women (M age = 31.4) Taiwan              | Depression<br>Sleep quality<br>Pregnancy  | Examined the patterns and psychological predictors of sleep quality in Taiwanese                                                                                                                                         | PSS, PSQI, EDPS, STAI<br><br>Mean gestational age = 21.7 weeks                                                          | Depression, state and trait anxiety and perceived stress were all significantly correlated with PSQI global sleep quality. Poorer sleep                                                                                                                                                                                                                                                                                                                                                                                                                                                                   |

|                             |                                                               |                                                                                                                    |                                                                                                                                                          |                                                                                                          |                                                                                                                                                                                                                                                                                                                  |
|-----------------------------|---------------------------------------------------------------|--------------------------------------------------------------------------------------------------------------------|----------------------------------------------------------------------------------------------------------------------------------------------------------|----------------------------------------------------------------------------------------------------------|------------------------------------------------------------------------------------------------------------------------------------------------------------------------------------------------------------------------------------------------------------------------------------------------------------------|
|                             |                                                               |                                                                                                                    | pregnant women. Cross-sectional                                                                                                                          |                                                                                                          | quality was associated with greater symptomatology of depression, anxiety and stress.                                                                                                                                                                                                                            |
| Hux et al. (2017)           | 103 pregnant women<br>( <i>M</i> age = 29.8)<br>United States | Allostatic load<br>Pregnancy<br>Psychosocial stress<br>Sleep Quality<br>Pittsburg Sleep<br>Quality Index<br>(PSQI) | Examined the association of allostatic load with psychological stressors, and, specifically, poor sleep quality. Cross-sectional                         | Allostatic load, PSQI<br><br>Mean gestational age = 12.2 weeks                                           | Allostatic load was positively correlated with the PSQI global score.                                                                                                                                                                                                                                            |
| Kamysheva et al. (2008)     | 215 pregnant women<br>( <i>M</i> age = 31.73)<br>Australia    | Pregnancy<br>Depression<br>Sleep quality                                                                           | Investigated relationships among women's body attitudes, physical symptoms, self-esteem, depression, and sleep quality during pregnancy. Cross-sectional | BDI and PSQI                                                                                             | Depression and sleep quality were significantly correlated. More depressive symptoms were associated with poorer sleep quality.                                                                                                                                                                                  |
| Kamysheva et al. (2010)     | 257 pregnant women<br>( <i>M</i> age = 31.64)<br>Australia    | Depressive<br>Symptoms<br>Sleep quality<br>Pregnancy                                                               | Examined the relationship between pregnancy physical discomforts, late pregnancy depressive symptoms, and sleep quality. Longitudinal                    | BDI and PSQI<br><br>Measured at two time points: T1 $G_{AM} = 18.42$ weeks and T2 $G_{AM} = 34.71$ weeks | Sleep quality and depressive symptoms were significantly correlated at each time point. Poorer sleep quality was associated with greater depressive symptomatology.                                                                                                                                              |
| Li et al. (2016)            | 227 pregnant women<br>( <i>M</i> age = 26.58)<br>China        | Prenatal maternal<br>stress<br>Sleep quality<br>Pregnant women                                                     | Examined the relationship between prenatal maternal stress, resilience, and sleep quality. Cross-sectional                                               | PSQI, PSRS<br><br>Measured during the second trimester                                                   | Pregnancy stress and sleep quality were significantly correlated in pregnant women in their second trimester. Poorer sleep quality was associated with greater stress.                                                                                                                                           |
| Matthews (2015)             | 968 pregnant women<br>( <i>M</i> age = 28.7)<br>United States | Pregnancy<br>Sleep<br>Mood                                                                                         | Explored the relationships of gestational weight gain to behavioral factors and maternal mental health during pregnancy. Cross-sectional                 | PSQI, EDPS, STAI-Short, PSS                                                                              | Across pregnancy and during the 1 <sup>st</sup> and 2 <sup>nd</sup> trimesters, depressive and state anxiety symptoms, and stress were significantly correlated with sleep quality. During the 3 <sup>rd</sup> trimester, only depressive and anxiety symptoms were significantly correlated with sleep quality. |
| Mirghaforvand et al. (2017) | 565 pregnant women<br>( <i>M</i> age = 28.7)<br>Iran          | Depression<br>Pregnancy<br>Sleep<br>Women                                                                          | Examined the relationship between depression and sleep quality among pregnant women. Cross-sectional                                                     | PSQI, EDPS                                                                                               | Sleep quality and all components of PSQI with the exception of sleep latency, were significantly correlated with EPDS.                                                                                                                                                                                           |

|                        |                                                             |                                                           |                                                                                                                                                                                                                                                                                       |                                                                                                                                                                                                           |                                                                                                                                                                                                                                                         |
|------------------------|-------------------------------------------------------------|-----------------------------------------------------------|---------------------------------------------------------------------------------------------------------------------------------------------------------------------------------------------------------------------------------------------------------------------------------------|-----------------------------------------------------------------------------------------------------------------------------------------------------------------------------------------------------------|---------------------------------------------------------------------------------------------------------------------------------------------------------------------------------------------------------------------------------------------------------|
| Mourady et al. (2017)  | 141 pregnant women ( <i>M</i> age = 30.52)<br>Lebanon       | Pregnancy<br>Sleep<br>Depression<br>Anxiety               | Examined how health-related quality of life might correlate to physical activity, sleep, worry, and depression. Cross-sectional                                                                                                                                                       | ISI, PSWQ, ZSRDS<br><br>Women were at various gestational age at time of measurement. Mean gestational age = 22.81 weeks                                                                                  | Insomnia, worry and depression were all significantly correlated.                                                                                                                                                                                       |
| Qui et al. (2016)      | 1488 pregnant women ( <i>M</i> age = 33.4)<br>United States | PSQI<br>Pregnancy<br>Depression<br>PHQ-9<br>DASS-21       | Evaluated the construct validity and factor structure of the PSQI and examined the relationship of maternal early pregnancy sleep quality with measures of antepartum depressive and anxiety symptoms. Cross-sectional; construct validity and factor structure                       | PSQI, DASS-21, PHQ-9; depression subscale<br><br>Measured at one time point<br>G <sub>AM</sub> = 21.7 weeks                                                                                               | PSQI was significantly correlated with PHQ-9 depression, DASS-21 total score and subscales of depression, anxiety, and stress. All were positively correlated. Poorer sleep quality associated with greater symptoms of depression, anxiety and stress. |
| Rallis et al. (2014)   | 214 pregnant women ( <i>M</i> age = 30.67)<br>Australia     | Pregnancy<br>Depression<br>Anxiety<br>Stress<br>Antenatal | Investigated the changes in depression, anxiety and stress symptoms across pregnancy, and explored the prospective relationships between these symptoms. Longitudinal                                                                                                                 | DASS-21; anxiety and stress subscales, EDPS, PSQI<br><br>Measured and reported at three time points: T1 G <sub>AM</sub> = 16.59 weeks, T2 G <sub>AM</sub> = 24.46 weeks, T3 G <sub>AM</sub> = 32.66 weeks | Sleep quality was significantly correlated with depressive and anxiety symptoms, and stress except sleep quality at T2 and anxiety at T1 and depressive symptoms at T2.                                                                                 |
| Reshadat et al. (2018) | 400 pregnant women ( <i>M</i> age = 27.76)<br>Iran          | Sleep quality<br>Mental factors<br>Pregnant women         | Identified psychological factors associated with sleep quality among pregnant women and investigated the relationship between sleep quality and depression, anxiety, stress, resilience, perceived social support, and marital adjustment. Descriptive-correlational; cross-sectional | DASS-21, PSQI                                                                                                                                                                                             | Sleep quality (PSQI) was significantly correlated with depression, anxiety and stress symptoms. Poor sleep quality was associated with higher depression, anxiety and stress symptomatology.                                                            |
| Simpson et al. (2016)  | 51 pregnant women ( <i>M</i> age = 30.2)<br>Canada          | Pregnancy<br>Depressive symptoms<br>Sleep quality         | Examined associations between daily rhythm disruptions and depressive symptoms during the third trimester. Cross-sectional                                                                                                                                                            | EDPS, PSQI, BRAIN<br><br>Measured during the third trimester (G <sub>AM</sub> = 31.9 weeks)                                                                                                               | Depressive symptoms were strongly correlated with sleep quality and the sleep subscale of BRIAN.                                                                                                                                                        |

|                         |                                                                     |                                                                      |                                                                                                                                                                                                               |                                                                                                                                 |                                                                                                                                                                                                 |
|-------------------------|---------------------------------------------------------------------|----------------------------------------------------------------------|---------------------------------------------------------------------------------------------------------------------------------------------------------------------------------------------------------------|---------------------------------------------------------------------------------------------------------------------------------|-------------------------------------------------------------------------------------------------------------------------------------------------------------------------------------------------|
| Skouteris et al. (2008) | 273 pregnant women<br>( <i>M</i> age = 31.46)<br>Australia          | Depressive symptoms<br>Pregnancy<br>Sleep quality                    | Explored the relationship between depressive symptoms and sleep quality during pregnancy. Longitudinal                                                                                                        | PSQI, BDI<br><br>Measured at three time points: T1 $G_{AM} = 18.32$ weeks, T2 $G_{AM} = 26.86$ weeks, T3 $G_{AM} = 34.63$ weeks | Significant correlations between BDI and PSQI scores across all time points.                                                                                                                    |
| Skouteris et al. (2009) | 252 pregnant women<br>( <i>M</i> age = 31.67)<br>Australia          | Sleep quality<br>Depressive Symptoms<br>Pregnancy                    | Examined the psychometrics of the PSQI, whether sleep quality predicted increases in depressive symptoms, and compared PSQI scores across levels of depressive symptoms. Longitudinal                         | PSQI, BDI<br><br>Measured at two time points: T1 $G_{AM} = 18.32$ weeks, T2 $G_{AM} = 34.63$ weeks                              | Sleep quality, sleep efficiency, night and daytime disturbances (with and without enthusiasm item) and total PSQI score were positively correlated with BDI and both time points.               |
| Skouteris et al. (2009) | 207 pregnant women<br>( <i>M</i> age = 31.74)<br>Australia          | Sleep<br>Depressive symptoms<br>Sleep quality<br>Pregnancy           | Explored the prospective relationship between depressive symptoms and anxiety across pregnancy and early postpartum. Longitudinal                                                                             | PSQI, BDI, STAI<br><br>Measured at two time points: T1 $G_{AM} = 18.32$ weeks, T2 $G_{AM} = 34.63$ weeks                        | Sleep quality was significantly correlated with BDI and STAI at all time points.                                                                                                                |
| Swanson et al. (2011)   | 114 pregnant women<br>( <i>M</i> age not reported)<br>United States | Pregnancy<br>Depressive symptoms<br>Anxiety<br>Insomnia              | Characterized the burden of insomnia symptoms in perinatal women seeking outpatient psychiatric treatment and examined relationships between insomnia and symptoms of depression and anxiety. Cross-sectional | ISI, PSWQ, EDPS                                                                                                                 | Depressive symptoms were significantly correlated with insomnia symptoms. Worry was significantly correlated with insomnia symptoms when controlled and not controlled for depressive symptoms. |
| Tsai et al. (2016)      | 197 pregnant women<br>( <i>M</i> age = 32)<br>Taiwan                | Actigraphy<br>Pregnancy<br>Sleep hygiene<br>Sleep quality<br>women   | Examined the associations of sleep hygiene and actigraphy measures of sleep with self-reported sleep quality. Cross-sectional                                                                                 | PSQI, Wrist Actigraphy for 7 days, SHPS, CES-D<br><br>Measured during the third trimester $G_{AM} = 33.23$ weeks                | Depression was significantly correlated with all SHPS subscales, sleep onset latency (actigraphy) and wake after sleep onset variability (actigraphy).                                          |
| Tsai et al. (2016)      | 274 pregnant women<br>( <i>M</i> age = 31.91)<br>Taiwan             | Actigraphy<br>Daytime sleepiness<br>Depression<br>Pregnancy<br>Sleep | Examined objective and self-reported sleep disturbances and symptoms of depression and daytime sleepiness in healthy pregnant women. Cross-sectional                                                          | PSQI, EDPS, Wrist Actigraphy monitor.<br><br>Mean gestational age = 33.22 weeks                                                 | Depressive symptomatology was significantly associated with objective total nighttime sleep less than 6 hours and self-reported poor sleep quality.                                             |

|                              |                                                         |                                                                       |                                                                                                                                                                                                                                                                                                                                            |                                                                                                                                                                    |                                                                                                                                                                                                                                                                                                               |
|------------------------------|---------------------------------------------------------|-----------------------------------------------------------------------|--------------------------------------------------------------------------------------------------------------------------------------------------------------------------------------------------------------------------------------------------------------------------------------------------------------------------------------------|--------------------------------------------------------------------------------------------------------------------------------------------------------------------|---------------------------------------------------------------------------------------------------------------------------------------------------------------------------------------------------------------------------------------------------------------------------------------------------------------|
| van der Zwan et al. (2017)   | 532 pregnant women<br>( <i>M</i> age = 31.6)<br>Finland | Pregnancy<br>Sleep<br>Anxiety                                         | Examined whether sleep quality and sleep duration, and changes in sleep are associated with the level of and changes in anxiety during pregnancy. Longitudinal                                                                                                                                                                             | BNSQ and PRAQ-R2<br><br>Measured at three time points: T1 $G_{AM} = 15.5$ weeks, T2 $G_{AM} = 25.2$ weeks, T3 $G_{AM} = 35.4$ weeks                                | Pregnancy-related anxiety, sleep duration and general sleep quality all were significantly correlated with one another. However, sleep duration at T1 and T2 did not significantly correlate with pregnancy-related anxiety.                                                                                  |
| Volkovich et al. (2016)      | 148 pregnant women<br>( <i>M</i> age = 29)<br>Finland   | Sleep<br>Women<br>Pregnancy<br>Actigraphy<br>Depression<br>Anxiety    | Studied the associations between objective and subjective sleep in pregnant women, examined which specific aspects of women's sleep are associated with depressive and anxiety symptoms and tested the moderating role of depressive and anxiety symptoms in the relations between objective and subjective sleep quality. Cross-sectional | PSQI, Wrist Actigraphy for 7 days, EDPS, BAI<br><br>Measured during the third trimester: between 34-37 weeks                                                       | None of the Actigraph measures were significantly correlated with EPDS or BAI. PSQI global score, sleep disturbance, daytime dysfunction, night duration, and sleep quality component scores were significantly correlated with EPDS and BAI, while sleep latency was only significantly correlated with BAI. |
| Wolynczyk-Gmaj et al. (2017) | 266 pregnant women<br>( <i>M</i> age = 30.6)<br>Poland  | Depression<br>Insomnia<br>Pregnancy                                   | Explore the determinants of insomnia during pregnancy. Cross-sectional                                                                                                                                                                                                                                                                     | AIS, EDPS, BAI                                                                                                                                                     | Severity of depressive symptoms was significantly associated with insomnia during pregnancy.                                                                                                                                                                                                                  |
| Yang, et al. (2018)          | 454 pregnant women<br>( <i>M</i> age = 28.5)<br>China   | Sleep quality<br>Pregnant women<br>Depression                         | Calculated the prevalence of sleep disorder during pregnancy, examined the difference in sleep quality among three trimesters, and identified determinants of sleep quality in pregnant women. Cross-sectional                                                                                                                             | PSQI, EDPS, PSS                                                                                                                                                    | Sleep quality was significantly correlated with depressive symptoms and perceived stress.                                                                                                                                                                                                                     |
| Yu et al. (2017)             | 1653 pregnant women<br>( <i>M</i> age = 27.9)<br>China  | Pregnancy<br>Depression<br>Anxiety<br>Sleep quality<br>Sleep duration | Examined the cross-sectional and longitudinal association of sleep with depression and anxiety among pregnant women. Cross-sectional and longitudinal                                                                                                                                                                                      | SDS, SAS, life behavior (sleep duration, sleep quality, and physical exercise)<br><br>Measured at three time points: T1 $G_{AM} = 11.59$ weeks, T2 $G_{AM} = 27.9$ | Sleep quality and sleep duration were both associated with SDS and SAS scores and depression and anxiety status.                                                                                                                                                                                              |

|                                                                                                                                                                                                                                                                                                                                                                                                                                                                                                                                                                                                                                                                                                                                                                                                                                                                                                                                                                                                                                                                                                                |                                                      |                                                              |                                                                                                                                                                                                          |                                                                                     |                                                                                                                                                                                                                                            |
|----------------------------------------------------------------------------------------------------------------------------------------------------------------------------------------------------------------------------------------------------------------------------------------------------------------------------------------------------------------------------------------------------------------------------------------------------------------------------------------------------------------------------------------------------------------------------------------------------------------------------------------------------------------------------------------------------------------------------------------------------------------------------------------------------------------------------------------------------------------------------------------------------------------------------------------------------------------------------------------------------------------------------------------------------------------------------------------------------------------|------------------------------------------------------|--------------------------------------------------------------|----------------------------------------------------------------------------------------------------------------------------------------------------------------------------------------------------------|-------------------------------------------------------------------------------------|--------------------------------------------------------------------------------------------------------------------------------------------------------------------------------------------------------------------------------------------|
|                                                                                                                                                                                                                                                                                                                                                                                                                                                                                                                                                                                                                                                                                                                                                                                                                                                                                                                                                                                                                                                                                                                |                                                      |                                                              |                                                                                                                                                                                                          | weeks, T3 $G_{AM} = 35.96$<br>weeks                                                 |                                                                                                                                                                                                                                            |
| Zhong et al.<br>(2015)                                                                                                                                                                                                                                                                                                                                                                                                                                                                                                                                                                                                                                                                                                                                                                                                                                                                                                                                                                                                                                                                                         | 642 pregnant women<br>( <i>M</i> age = 28.8)<br>Peru | Pittsburgh Sleep<br>Quality index<br>Pregnant women<br>Sleep | Evaluated the construct validity<br>factor structure of the Spanish-<br>language version of the PSQI<br>among pregnant Peruvian<br>women. Cross-sectional;<br>construct validity and factor<br>structure | PSQI, FIRST, PHQ-9;<br>depression, GAD-7<br><br>Measured once $GA \leq 16$<br>weeks | PSQI global score, global score<br>excluding component 7 (sleep<br>medication use), factors 1, 2, and 3<br>were all significantly correlated with<br>PHQ-9, GAD-7. FIRST was<br>significantly associated with all PSQI<br>except factor 2. |
| <p>Note. PSQI = Pittsburg Sleep Quality Index. EPDS = Edinburgh Postnatal Depression Scale. PSS = Perceived Stress Scale. HADS = Hospital Anxiety and Depression Scale. DASS-21 = Depression, Anxiety, and Stress Scale-21 Items. GHQ-28 = General Health Questionnaire (depression, anxiety subscales). ISIS = Insomnia Severity Index. BIS = Bergen Insomnia Scale. CES-D = Center for Epidemiological Studies – Depression Scale. STAI = State/Trait Anxiety Inventory. VSH = Verran and Snyder-Halpern Sleep Scale. PSRS = Pregnancy Stress Rating Scale. PSWQ = Penn State Worry Questionnaire. ZSRDS = Zung Self-Rating Depression Scale. PHQ-9 = Patient Health Questionnaire depression subscale. BRAIN = Biological Rhythms Interview of Assessment in Neuropsychiatry. SHPS = Sleep Hygiene Practice Scale. BNSQ = Basic Nordic Sleep Questionnaire. PRAQ-R2 = Pregnancy-related anxiety questionnaire. AIS = Athens Insomnia Scale. SDS = Self-rating depression scale. SAS = Self-rating anxiety scale. FIRST = Ford Insomnia Response to Stress Test. GAD-7 = Generalized Anxiety Disorder-7.</p> |                                                      |                                                              |                                                                                                                                                                                                          |                                                                                     |                                                                                                                                                                                                                                            |

Table S2. Effect Sizes of Sleep and Psychological Measures

| Author                         | Sleep Measure                                           | Depression Measure                   | Anxiety Measure                   | Stress Measure                   | Depression Effect Size | Anxiety Effect Size | Stress Effect Size |
|--------------------------------|---------------------------------------------------------|--------------------------------------|-----------------------------------|----------------------------------|------------------------|---------------------|--------------------|
| Allison et al. (2012)          | PSQI Sleep Duration                                     | EPDS                                 | -                                 | -                                | .470*                  | -                   | -                  |
|                                | PSQI Sleep Quality                                      | EPDS                                 | -                                 | -                                | .766**                 | -                   | -                  |
|                                | PSQI Sleep Latency                                      | EPDS                                 | -                                 | -                                | .696**                 | -                   | -                  |
| Babaie et al. (2015)           | ISI <sup>b</sup>                                        | GHQ-28 Depression <sup>b</sup>       | GHQ-28 Anxiety <sup>b</sup>       | -                                | 0.407*                 | 1.212*              | -                  |
| Chang et al. (2015)            | PSQI Sleep Duration <sup>a</sup>                        | EPDS <sup>a</sup>                    | -                                 | PSS <sup>a</sup>                 | 0.450***               | -                   | 0.058              |
|                                | PSQI Sleep Quality <sup>a</sup>                         | EPDS <sup>a</sup>                    | -                                 | PSS <sup>a</sup>                 | 0.699***               | -                   | .1383              |
|                                | PSQI Sleep Latency <sup>a</sup>                         | EPDS <sup>a</sup>                    | -                                 | PSS <sup>a</sup>                 | 0.721***               | -                   | 0.199              |
|                                | PSQI Sleep Disturbance <sup>a</sup>                     | EPDS <sup>a</sup>                    | -                                 | PSS <sup>a</sup>                 | 1.090***               | -                   | 0.301              |
| Coo et al. (2014)              | Actigraph Daily Nap Number <sup>c</sup>                 | EPDS <sup>c</sup>                    | DASS - Anxiety Scale <sup>c</sup> | DASS - Stress Scale <sup>c</sup> | 0.275                  | 0.275               | 0.545              |
|                                | Actigraph Daily Nap Number <sup>c</sup>                 | DASS - Depression Scale <sup>c</sup> | HADS - Anxiety Scale <sup>c</sup> | -                                | 0                      | 0.501               | -                  |
|                                | Actigraph Daily Nap Number <sup>c</sup>                 | HADS - Depression Scale <sup>c</sup> | -                                 | -                                | 0                      | -                   | -                  |
|                                | PSQI Daytime Dysfunction Due to Poor Sleep <sup>c</sup> | EPDS <sup>c</sup>                    | DASS - Anxiety Scale <sup>c</sup> | DASS - Stress Scale <sup>c</sup> | 0.821                  | 0.726               | 1.402*             |
|                                | PSQI Daytime Dysfunction Due to Poor Sleep <sup>c</sup> | DASS - Depression Scale <sup>c</sup> | HADS - Anxiety Scale <sup>c</sup> | -                                | 1.205**                | 1.516*              | -                  |
|                                | PSQI Daytime Dysfunction Due to Poor Sleep <sup>c</sup> | HADS - Depression Scale <sup>c</sup> | -                                 | -                                | 1.142**                | -                   | -                  |
| D'Anna-Hernandez et al. (2016) | Self-reported Sleep Duration <sup>d</sup>               | EPDS <sup>d</sup>                    | -                                 | -                                | 0.118                  | -                   | -                  |
|                                | Self-reported Minutes to Fall Asleep <sup>d</sup>       | EPDS <sup>d</sup>                    | -                                 | -                                | 0.219                  | -                   | -                  |

|                         |                                                                    |                   |                         |                              |          |          |          |
|-------------------------|--------------------------------------------------------------------|-------------------|-------------------------|------------------------------|----------|----------|----------|
|                         | Self-reported Number of Times Woke <sup>d</sup>                    | EPDS <sup>d</sup> | -                       | -                            | 1.077*** | -        | -        |
| Dorheim et al. (2012)   | BIS - Daytime Impairment <sup>c</sup>                              | EPDS <sup>c</sup> | -                       | -                            | 0.845    | -        | -        |
| Field et al. (2007)     | VSH Sleep Disturbance <sup>b</sup>                                 | CESD <sup>b</sup> | STAI <sup>b</sup>       | Norepinehrine <sup>b</sup>   | 1.244*   | 0.769**  | 0.769**  |
|                         | VSH Sleep Disturbance <sup>c</sup>                                 | CESD <sup>b</sup> | STAI <sup>b</sup>       | Cortisol <sup>b</sup>        | 1.179**  | 0.627**  | 0.581**  |
|                         | VSH Sleep Disturbance <sup>b</sup>                                 | -                 | STAI <sup>c</sup>       | Cortisol <sup>c</sup>        | -        | 0.536*   | 0.54**   |
|                         | VSH Sleep Disturbance <sup>c</sup>                                 | -                 | STAI <sup>c</sup>       | -                            | -        | 0.794**  | -        |
| Hall et al. (2009)      | Mindell's Sleep Questionnaire - Sleep Hours Per Night <sup>c</sup> | -                 | STAI-State <sup>c</sup> | -                            | -        | .449***  | -        |
| Hung et al. (2013)      | PSQI Global Score <sup>b</sup>                                     | EPDS <sup>b</sup> | STAI-State <sup>b</sup> | PSS <sup>b</sup>             | 0.896*** | 0.673*** | 0.559*** |
|                         | PSQI Global Score <sup>b</sup>                                     | -                 | STAI-Trait <sup>b</sup> | -                            | -        | 0.721*** | -        |
| Hux et al. (2017)       | PSQI Global Score <sup>a</sup>                                     | -                 | -                       | Allostatic Load <sup>a</sup> | -        | -        | 0.468*   |
| Kamysheva et al. (2008) | PSQI Global Score <sup>b</sup>                                     | BDI <sup>b</sup>  | -                       | -                            | 1.030**  | -        | -        |
| Kamysheva et al. (2010) | PSQI Global Score <sup>b</sup>                                     | BDI <sup>b</sup>  | -                       | -                            | 1.211**  | -        | -        |
|                         | PSQI Global Score <sup>c</sup>                                     | BDI <sup>b</sup>  | -                       | -                            | 0.673**  | -        | -        |
|                         | PSQI Global Score <sup>b</sup>                                     | BDI <sup>c</sup>  | -                       | -                            | 1.033**  | -        | -        |
|                         | PSQI Global Score <sup>c</sup>                                     | BDI <sup>c</sup>  | -                       | -                            | 0.977**  | -        | -        |
| Li et al. (2016)        | PSQI Global Score <sup>c</sup>                                     | -                 | -                       | PSRS <sup>b</sup>            | -        | -        | 0.650**  |
| Matthews (2015)         | PSQI Global Score <sup>d</sup>                                     | EPDS <sup>d</sup> | STAI-State <sup>d</sup> | PSS <sup>d</sup>             | .604**   | .179**   | .721**   |
|                         | PSQI Global Score <sup>a</sup>                                     | EPDS <sup>a</sup> | STAI-State <sup>a</sup> | PSS <sup>a</sup>             | 1.536**  | 1.033**  | 1.348**  |
|                         | PSQI Global Score <sup>b</sup>                                     | EPDS <sup>b</sup> | STAI-State <sup>b</sup> | PSS <sup>b</sup>             | .845**   | .260*    | .896**   |

|                             |                                                         |                                      |                                   |                                  |          |         |         |
|-----------------------------|---------------------------------------------------------|--------------------------------------|-----------------------------------|----------------------------------|----------|---------|---------|
|                             | PSQI Global Score <sup>c</sup>                          | EPDS <sup>c</sup>                    | STAI-State <sup>c</sup>           | PSS <sup>c</sup>                 | .492**   | .118    | .581**  |
| Mirghaforvand et al. (2017) | PSQI Global Score <sup>b</sup>                          | EPDS <sup>b</sup>                    | -                                 | -                                | 0.604*** | -       | -       |
|                             | PSQI Sleep Quality <sup>b</sup>                         | EPDS <sup>b</sup>                    | -                                 | -                                | 0.199*   | -       | -       |
|                             | PSQI Sleep Latency <sup>b</sup>                         | EPDS <sup>b</sup>                    | -                                 | -                                | 0.040    | -       | -       |
|                             | PSQI Sleep Duration <sup>b</sup>                        | EPDS <sup>b</sup>                    | -                                 | -                                | 0.322*** | -       | -       |
|                             | PSQI Sleep Efficiency <sup>b</sup>                      | EPDS <sup>b</sup>                    | -                                 | -                                | 0.494*** | -       | -       |
|                             | PSQI Sleep Disturbance <sup>b</sup>                     | EPDS <sup>b</sup>                    | -                                 | -                                | 0.605*** | -       | -       |
|                             | PSQI Use of sleeping medication <sup>b</sup>            | EPDS <sup>b</sup>                    | -                                 | -                                | 0.282^   | -       | -       |
|                             | PSQI Daytime Dysfunction Due to Poor Sleep <sup>b</sup> | EPDS <sup>b</sup>                    | -                                 | -                                | 0.472*** | -       | -       |
| Mourady et al. (2017)       | ISI <sup>b</sup>                                        | ZSRDS <sup>b</sup>                   | PSWQ <sup>b</sup>                 | -                                | 0.625^   | 1.307^  | -       |
| Qui et al. (2016)           | PSQI Global Score <sup>b</sup>                          | DASS - Depression Scale <sup>b</sup> | DASS - Anxiety Scale <sup>b</sup> | DASS - Stress Scale <sup>b</sup> | 0.821^   | 0.606^  | 0.796^  |
|                             | PSQI Global Score <sup>b</sup>                          | PHQ-9 <sup>b</sup>                   | -                                 | -                                | 1.094^   | -       | -       |
|                             | PSQI Without Medication Use <sup>b</sup>                | DASS - Depression Scale <sup>b</sup> | DASS - Anxiety Scale <sup>b</sup> | DASS - Stress Scale <sup>b</sup> | 0.796^   | 0.606^  | 0.771^  |
|                             | PSQI Without Medication Use <sup>b</sup>                | PHQ-9 <sup>b</sup>                   | -                                 | -                                | 1.064^   | -       | -       |
| Rallis et al. (2014)        | PSQI Global Score <sup>b</sup>                          | EPDS <sup>b</sup>                    | DASS - Anxiety Scale <sup>b</sup> | DASS - Stress Scale <sup>b</sup> | 0.471**  | 0.818** | 0.537** |
|                             | PSQI Global Score <sup>b</sup>                          | EPDS <sup>b</sup>                    | DASS - Anxiety Scale <sup>b</sup> | DASS - Stress Scale <sup>b</sup> | 0.536**  | 0.160** | 0.323** |
|                             | PSQI Global Score <sup>b</sup>                          | EPDS <sup>c</sup>                    | DASS - Anxiety Scale <sup>c</sup> | DASS - Stress Scale <sup>c</sup> | 0.282*   | 0.449** | 0.428** |

|                         |                                                                          |                                      |                                   |                                  |                    |                    |         |
|-------------------------|--------------------------------------------------------------------------|--------------------------------------|-----------------------------------|----------------------------------|--------------------|--------------------|---------|
|                         | PSQI Global Score <sup>b</sup>                                           | EPDS <sup>b</sup>                    | DASS - Anxiety Scale <sup>b</sup> | DASS - Stress Scale <sup>b</sup> | 1.571**            | 0.559              | 0.720*  |
|                         | PSQI Global Score <sup>b</sup>                                           | EPDS <sup>b</sup>                    | DASS - Anxiety Scale <sup>b</sup> | DASS - Stress Scale <sup>b</sup> | 0.160              | 0.344*             | 0.140   |
|                         | PSQI Global Score <sup>b</sup>                                           | EPDS <sup>c</sup>                    | DASS - Anxiety Scale <sup>c</sup> | DASS - Stress Scale <sup>c</sup> | 2.060**            | 0.428**            | 0.386** |
| Reshadat et al. (2018)  | PSQI Global Score <sup>c</sup>                                           | DASS - Depression Scale <sup>c</sup> | DASS - Anxiety Scale <sup>c</sup> | DASS - Stress Scale <sup>c</sup> | 1.092 <sup>^</sup> | 1.183 <sup>^</sup> | 1.034*  |
| Simpson et al. (2016)   | PSQI Global Score <sup>c</sup>                                           | EPDS <sup>c</sup>                    | -                                 | -                                | 1.230*             | -                  | -       |
|                         | BRIAN Sleep Scale <sup>c</sup>                                           | EPDS <sup>c</sup>                    | -                                 | -                                | 1.243**            | -                  | -       |
| Skouteris et al. (2008) | PSQI Global Score <sup>b</sup>                                           | BDI <sup>b</sup>                     | -                                 | -                                | 1.120**            | -                  | -       |
|                         | PSQI Global Score <sup>b</sup>                                           | BDI <sup>b</sup>                     | -                                 | -                                | 0.884**            | -                  | -       |
|                         | PSQI Global Score <sup>c</sup>                                           | BDI <sup>b</sup>                     | -                                 | -                                | 0.673**            | -                  | -       |
|                         | PSQI Global Score <sup>b</sup>                                           | BDI <sup>b</sup>                     | -                                 | -                                | 0.923**            | -                  | -       |
|                         | PSQI Global Score <sup>b</sup>                                           | BDI <sup>b</sup>                     | -                                 | -                                | 0.949**            | -                  | -       |
|                         | PSQI Global Score <sup>c</sup>                                           | BDI <sup>b</sup>                     | -                                 | -                                | 0.697**            | -                  | -       |
|                         | PSQI Global Score <sup>b</sup>                                           | BDI <sup>c</sup>                     | -                                 | -                                | 1.061**            | -                  | -       |
|                         | PSQI Global Score <sup>b</sup>                                           | BDI <sup>c</sup>                     | -                                 | -                                | 1.181**            | -                  | -       |
| Skouteris et al. (2009) | PSQI Global Score <sup>b</sup>                                           | BDI <sup>b</sup>                     | -                                 | -                                | 1.061**            | -                  | -       |
|                         | PSQI Sleep Efficiency <sup>b</sup>                                       | BDI <sup>b</sup>                     | -                                 | -                                | 0.604**            | -                  | -       |
|                         | PSQI Night and Daytime Disturbances <sup>b</sup>                         | BDI <sup>b</sup>                     | -                                 | -                                | 1.004**            | -                  | -       |
|                         | PSQI Night and Daytime Disturbances without enthusiasm item <sup>b</sup> | BDI <sup>b</sup>                     | -                                 | -                                | 0.604**            | -                  | -       |
|                         | PSQI Sleep Quality <sup>b</sup>                                          | BDI <sup>b</sup>                     | -                                 | -                                | 1.061**            | -                  | -       |
|                         | PSQI Global Score <sup>c</sup>                                           | BDI <sup>c</sup>                     | -                                 | -                                | 0.769**            | -                  | -       |

|                         |                                                                          |                                         |                                         |   |         |          |   |
|-------------------------|--------------------------------------------------------------------------|-----------------------------------------|-----------------------------------------|---|---------|----------|---|
|                         | PSQI Sleep Efficiency <sup>c</sup>                                       | BDI <sup>c</sup>                        | -                                       | - | 0.537** | -        | - |
|                         | PSQI Night and Daytime Disturbances <sup>c</sup>                         | BDI <sup>c</sup>                        | -                                       | - | 0.819** | -        | - |
|                         | PSQI Night and Daytime Disturbances without enthusiasm item <sup>c</sup> | BDI <sup>c</sup>                        | -                                       | - | 0.471** | -        | - |
|                         | PSQI Sleep Quality <sup>c</sup>                                          | BDI <sup>c</sup>                        | -                                       | - | 1.032** | -        | - |
| Skouteris et al. (2009) | PSQI Global Score <sup>b</sup>                                           | BDI <sup>b</sup>                        | STAI <sup>b</sup>                       | - | 0.948** | 0.627**  | - |
|                         | PSQI Global Score <sup>c</sup>                                           | BDI <sup>b</sup>                        | STAI <sup>b</sup>                       | - | 0.696** | 0.4709** | - |
|                         | PSQI Global Score <sup>b</sup>                                           | BDI <sup>b</sup>                        | STAI <sup>b</sup>                       | - | 1.244** | 1.530**  | - |
|                         | PSQI Global Score <sup>c</sup>                                           | BDI <sup>c</sup>                        | STAI <sup>c</sup>                       | - | 1.119** | 1.119**  | - |
| Swanson et al. (2011)   | ISI <sup>c</sup>                                                         | EPDS <sup>c</sup>                       | PSWQ <sup>c</sup>                       | - | 1.145** | 1.175**  | - |
|                         | ISI <sup>c</sup>                                                         | EPDS – Controlled for PSWQ <sup>c</sup> | PSWQ - Controlled for EPDS <sup>c</sup> | - | 0.301   | 0.405*   | - |
| Tsai et al. (2016)      | SHPS - Sleep Schedule <sup>c</sup>                                       | CESD <sup>c</sup>                       | -                                       | - | 0.604** | -        | - |
|                         | SHPS- Arousal Related Behavior <sup>c</sup>                              | CESD <sup>c</sup>                       | -                                       | - | 1.060** | -        | - |
|                         | SHPS- Sleep Environment <sup>c</sup>                                     | CESD <sup>c</sup>                       | -                                       | - | 0.626** | -        | - |
|                         | Actigraph - Sleep Onset Latency <sup>c</sup>                             | CESD <sup>c</sup>                       | -                                       | - | 0.428** | -        | - |
|                         | Actigraph - Wake After Sleep Onset <sup>c</sup>                          | CESD <sup>c</sup>                       | -                                       | - | 0.428** | -        | - |
|                         | Actigraphy - Night duration <sup>c</sup>                                 | CESD <sup>c</sup>                       | -                                       | - | 0.241   | -        | - |
| Tsai et al. (2016)      | Actigraph - Total nighttime sleep <6 hours <sup>c</sup>                  | CESD <sup>c</sup>                       | -                                       | - | 0.514*  | -        | - |
|                         | Actigraph - Sleep efficiency < 85% <sup>c</sup>                          | CESD <sup>c</sup>                       | -                                       | - | 0.080   | -        | - |

|                                   |                                                          |                      |                      |        |         |         |   |
|-----------------------------------|----------------------------------------------------------|----------------------|----------------------|--------|---------|---------|---|
|                                   | Actigraph - Sleep onset latency >30 minutes <sup>c</sup> | CESD <sup>c</sup>    | -                    | -      | 0.040   | -       | - |
|                                   | PSQI Global Score <sup>c</sup>                           | CESD <sup>c</sup>    | -                    | -      | 0.650*  | -       | - |
| van der Zwan et al. (2017)        | BNSQ- Sleep Quality <sup>b</sup>                         | -                    | PRAQ-R2 <sup>b</sup> | -      | 0.241** | -       | - |
|                                   | BNSQ- Sleep Quality <sup>b</sup>                         | -                    | PRAQ-R2 <sup>b</sup> | -      | 0.345** | -       | - |
|                                   | BNSQ- Sleep Quality <sup>c</sup>                         | -                    | PRAQ-R2 <sup>c</sup> | -      | 0.282** | -       | - |
|                                   | BNSQ- Sleep Quality <sup>b</sup>                         | -                    | PRAQ-R2 <sup>b</sup> | -      | 0.262** | -       | - |
|                                   | BNSQ- Sleep Quality <sup>b</sup>                         | -                    | PRAQ-R2 <sup>b</sup> | -      | 0.365** | -       | - |
|                                   | BNSQ- Sleep Quality <sup>c</sup>                         | -                    | PRAQ-R2 <sup>c</sup> | -      | 0.283** | -       | - |
|                                   | BNSQ- Sleep Quality <sup>b</sup>                         | -                    | PRAQ-R2 <sup>b</sup> | -      | 0.303** | -       | - |
|                                   | BNSQ- Sleep Quality <sup>b</sup>                         | -                    | PRAQ-R2 <sup>b</sup> | -      | 0.345** | -       | - |
|                                   | BNSQ- Sleep Quality <sup>c</sup>                         | -                    | PRAQ-R2 <sup>c</sup> | -      | 0.387** | -       | - |
|                                   | BNSQ- Sleep Quality <sup>b</sup>                         | -                    | PRAQ-R2 <sup>b</sup> | -      | 0.020   | -       | - |
|                                   | BNSQ- Sleep Quality <sup>b</sup>                         | -                    | PRAQ-R2 <sup>b</sup> | -      | 0.100   | -       | - |
|                                   | BNSQ- Sleep Quality <sup>c</sup>                         | -                    | PRAQ-R2 <sup>c</sup> | -      | 0.160   | -       | - |
|                                   | BNSQ- Sleep Quality <sup>b</sup>                         | -                    | PRAQ-R2 <sup>b</sup> | -      | 0.120   | -       | - |
|                                   | BNSQ- Sleep Quality <sup>b</sup>                         | -                    | PRAQ-R2 <sup>b</sup> | -      | 0.120   | -       | - |
|                                   | BNSQ- Sleep Quality <sup>c</sup>                         | -                    | PRAQ-R2 <sup>b</sup> | -      | 0.160   | -       | - |
| BNSQ- Sleep Duration <sup>c</sup> | -                                                        | PRAQ-R2 <sup>b</sup> | -                    | 0.282* | -       | -       |   |
| BNSQ- Sleep Duration <sup>c</sup> | -                                                        | PRAQ-R2 <sup>b</sup> | -                    | 0.241* | -       | -       |   |
| BNSQ- Sleep Duration <sup>c</sup> | -                                                        | PRAQ-R2 <sup>c</sup> | -                    | 0.241* | -       | -       |   |
| Volkovich et al. (2016)           | Actigraph - Night Duration <sup>c</sup>                  | EPDS <sup>c</sup>    | BAI <sup>c</sup>     | -      | 0.140   | 0.080   | - |
|                                   | Actigraph – Night-wakings <sup>c</sup>                   | EPDS <sup>c</sup>    | BAI <sup>c</sup>     | -      | 0.080   | 0.180   | - |
|                                   | Actigraph - Sleep percent <sup>c</sup>                   | EPDS <sup>c</sup>    | BAI <sup>c</sup>     | -      | 0.040   | 0.100   | - |
|                                   | PSQI Sleep Disturbance <sup>c</sup>                      | EPDS <sup>c</sup>    | BAI <sup>c</sup>     | -      | 0.719** | 0.920** | - |
|                                   | PSQI Sleep Latency <sup>c</sup>                          | EPDS <sup>c</sup>    | BAI <sup>c</sup>     | -      | 0.302   | 0.449** | - |

|                              |                                                         |                         |                         |                  |                    |                    |         |
|------------------------------|---------------------------------------------------------|-------------------------|-------------------------|------------------|--------------------|--------------------|---------|
|                              | PSQI Sleep Efficiency <sup>c</sup>                      | EPDS <sup>c</sup>       | BAI <sup>c</sup>        | -                | 0.080              | 0.302              | -       |
|                              | PSQI Daytime Dysfunction Due to Poor Sleep <sup>c</sup> | EPDS <sup>c</sup>       | BAI <sup>c</sup>        | -                | 1.209**            | 0.817**            | -       |
|                              | PSQI Night Duration <sup>c</sup>                        | EPDS <sup>c</sup>       | BAI <sup>c</sup>        | -                | 0.080              | 0.080              | -       |
|                              | PSQI Sleep Quality <sup>c</sup>                         | EPDS <sup>c</sup>       | BAI <sup>c</sup>        | -                | 0.536**            | 0.648**            | -       |
|                              | PSQI Global Score <sup>c</sup>                          | EPDS <sup>c</sup>       | BAI <sup>c</sup>        | -                | 0.743**            | -                  | -       |
| Wolynczyk-Gmaj et al. (2017) | Athens Insomnia Scale <sup>c</sup>                      | BDI <sup>c</sup>        | -                       | -                | 0.080**            | -                  | -       |
| Yang, et al. (2018)          | PSQI Global Score <sup>b</sup>                          | EPDS <sup>b</sup>       | -                       | PSS <sup>b</sup> | 0.951**            | -                  | 0.674** |
| Yu et al. (2017)             | Self-report Sleep Duration <sup>a</sup>                 | SDS <sup>a</sup>        | SAS <sup>a</sup>        | -                | 0.771**            | 0.629 <sup>^</sup> | -       |
|                              | Self-report Sleep Duration <sup>b</sup>                 | SDS <sup>b</sup>        | SAS <sup>b</sup>        | -                | 0.747**            | 0.516***           | -       |
|                              | Self-report Sleep Duration <sup>c</sup>                 | SDS <sup>c</sup>        | SAS <sup>c</sup>        | -                | 0.747**            | 0.583**            | -       |
|                              | Self-report Bad Sleep Quality <sup>a</sup>              | SDS <sup>a</sup>        | SAS <sup>a</sup>        | -                | 0.898 <sup>^</sup> | 1.621 <sup>^</sup> | -       |
|                              | Self-report Bad Sleep Quality <sup>b</sup>              | SDS <sup>b</sup>        | SAS <sup>b</sup>        | -                | 0.899 <sup>^</sup> | 0.516 <sup>^</sup> | -       |
|                              | Self-report Bad Sleep Quality <sup>c</sup>              | SDS <sup>c</sup>        | SAS <sup>c</sup>        | -                | 0.899 <sup>^</sup> | 1.621 <sup>^</sup> | -       |
|                              | Self-report Sleep Duration <8hrs <sup>a</sup>           | SDS Status <sup>a</sup> | SAS Status <sup>a</sup> | -                | 0.747 <sup>^</sup> | 0.899 <sup>^</sup> | -       |
|                              | Self-report Sleep Duration <8hrs <sup>b</sup>           | SDS Status <sup>b</sup> | SAS Status <sup>b</sup> | -                | 0.699**            | 0.899 <sup>^</sup> | -       |
|                              | Self-report Sleep Duration <8hrs <sup>c</sup>           | SDS Status <sup>c</sup> | SAS Status <sup>c</sup> | -                | 0.771***           | 0.925              | -       |
|                              | Self-report Bad Sleep Quality <sup>a</sup>              | SDS Status <sup>a</sup> | SAS Status <sup>a</sup> | -                | 0.796 <sup>^</sup> | 0.872 <sup>^</sup> | -       |
|                              | Self-report Bad Sleep Quality <sup>b</sup>              | SDS Status <sup>b</sup> | SAS Status <sup>b</sup> | -                | 0.771 <sup>^</sup> | 0.747 <sup>^</sup> | -       |
|                              | Self-report Bad Sleep Quality <sup>c</sup>              | SDS Status <sup>c</sup> | SAS Status <sup>c</sup> | -                | 0.872 <sup>^</sup> | 0.796 <sup>^</sup> | -       |
| Zhong et al. (2015)          | PSQI Global Score <sup>a</sup>                          | PHQ-9 <sup>a</sup>      | GAD-7 <sup>a</sup>      | -                | 1.123 <sup>^</sup> | 1.035 <sup>^</sup> | -       |
|                              | PSQI without medication use <sup>a</sup>                | PHQ-9 <sup>a</sup>      | GAD-7 <sup>a</sup>      | -                | 1.123 <sup>^</sup> | 1.035 <sup>^</sup> | -       |
|                              | PSQI (sleep disturbance, latency, daytime dysfunction)  | PHQ-9 <sup>a</sup>      | GAD-7 <sup>a</sup>      | -                | 1.216 <sup>^</sup> | 1.123 <sup>^</sup> | -       |

|  |                                                                                |                    |                    |   |                    |                    |   |
|--|--------------------------------------------------------------------------------|--------------------|--------------------|---|--------------------|--------------------|---|
|  | due to sleepiness, overall sleep quality) <sup>a</sup>                         |                    |                    |   |                    |                    |   |
|  | PSQI (sleep duration, efficiency) <sup>a</sup>                                 | PHQ-9 <sup>a</sup> | GAD-7 <sup>a</sup> | - | 0.221*             | 0.221*             | - |
|  | PSQI (sleep latency, overall sleep quality, sleep medication use) <sup>a</sup> | PHQ-9 <sup>a</sup> | GAD-7 <sup>a</sup> | - | 0.872 <sup>^</sup> | 0.628 <sup>^</sup> | - |

Note. <sup>a</sup> = 1<sup>st</sup> trimester, <sup>b</sup> = 2<sup>nd</sup> trimester, <sup>c</sup> = 3<sup>rd</sup> trimester, <sup>d</sup> = averaged across pregnancy, <sup>e</sup> = trimester not specified. \**p* < 0.05, \*\**p* < 0.01, \*\*\**p* < 0.001, \*\*\*\**p* < 0.001  
Note. PSQI = Pittsburg Sleep Quality Index. EPDS = Edinburgh Postnatal Depression Scale. PSS = Perceived Stress Scale. HADS = Hospital Anxiety and Depression Scale. DASS-21 = Depression, Anxiety, and Stress Scale-21 Items. GHQ-28 = General Health Questionnaire (depression, anxiety subscales). ISIS = Insomnia Severity Index. BIS = Bergen Insomnia Scale. CES-D = Center for Epidemiological Studies – Depression Scale. STAI = State/Trait Anxiety Inventory. VSH = Verran and Snyder-Halpern Sleep Scale. PSRS = Pregnancy Stress Rating Scale. PSWQ = Penn State Worry Questionnaire. ZSRDS = Zung Self-Rating Depression Scale. PHQ-9 = Patient Health Questionnaire depression subscale. BRAIN = Biological Rhythms Interview of Assessment in Neuropsychiatry. SHPS = Sleep Hygiene Practice Scale. BNSQ = Basic Nordic Sleep Questionnaire. PRAQ-R2 = Pregnancy-related anxiety questionnaire. AIS = Athens Insomnia Scale. SDS = Self-rating depression scale. SAS = Self-rating anxiety scale. FIRST = Ford Insomnia Response to Stress Test. GAD-7 = Generalized Anxiety Disorder-7.

Note. Higher scores on the psychological health, sleep quality, and insomnia measures indicate higher depression, anxiety, and stress, poorer sleep quality, and greater insomnia symptomatology. Higher scores on the sleep duration items indicate shorter sleep duration whereas sleep log reported sleep duration will depend on actual hours reported sleeping.

Table 3S. Moderator Results (Overall Sleep Variables and Depression and Anxiety/Stress)

|                           | Sleep Quality and Depression |                |             |      | Sleep Duration and Depression |                |             |                    | Sleep Quality and Anxiety/Stress |                |             |                  | Sleep Duration and Anxiety/Stress |                |             |                    |
|---------------------------|------------------------------|----------------|-------------|------|-------------------------------|----------------|-------------|--------------------|----------------------------------|----------------|-------------|------------------|-----------------------------------|----------------|-------------|--------------------|
|                           | <i>df</i>                    | Sum of Squares | Mean Square | F    | <i>df</i>                     | Sum of Squares | Mean Square | F                  | <i>df</i>                        | Sum of Squares | Mean Square | F                | <i>df</i>                         | Sum of Squares | Mean Square | F                  |
| Gestational Age/Trimester | 2, 45                        | .01            | .01         | .06  | 2, 5                          | .13            | .06         | 1.3                | 2, 51                            | 1.69           | .85         | 6.6 <sup>#</sup> | 2, 7                              | .11            | .05         | .67                |
| Parity                    | 2, 43                        | .11            | .06         | .57  | 1, 7                          | .06            | .06         | 1.1                | 2, 47                            | .73            | .37         | 2.7 <sup>^</sup> | 1, 10                             | .20            | .20         | 2.25               |
| Marital Status            | 2, 51                        | .02            | .01         | .09  | 2, 7                          | .54            | .27         | 11.9 <sup>#</sup>  | 1, 42                            | .00            | .00         | .02              | 1, 6                              | .34            | .34         | 8.55               |
| Socioeconomic Status      | 2,42                         | .11            | .05         | .50  | -                             | -              | -           | -                  | 2, 36                            | .93            | .47         | 3.6              | 1, 6                              | .03            | .03         | .35                |
| BMI                       | 2, 20                        | .25            | .12         | 1.93 | 2, 6                          | .24            | .12         | 189.6 <sup>#</sup> | 1, 20                            | .42            | .42         | 2.6              | 1, 5                              | .40            | .40         | 11.67 <sup>*</sup> |
| Sleep Duration Guidelines | 2, 19                        | .02            | .02         | .36  | 2, 8                          | .21            | .11         | 1.7                | 1, 33                            | .00            | .00         | .02              | 1, 10                             | .20            | .20         | 2.25               |

Note: \**p* value ≤ 0.05, #*p* value ≤ 0.01, <sup>^</sup>trending *p* value ≤ 0.1

Table 4S. Moderator Results (Means and SD - Overall Sleep Variables and Depression and Anxiety/Stress)

|                           | Sleep Duration and Depression |           |                     |                    | Sleep Quality and Anxiety/Stress |            |                                     |                          | Sleep Duration and Anxiety/Stress |           |           |            |
|---------------------------|-------------------------------|-----------|---------------------|--------------------|----------------------------------|------------|-------------------------------------|--------------------------|-----------------------------------|-----------|-----------|------------|
|                           | Category                      | M ± SD    | Category            | M ± SD             | Category                         | M ± SD     | Category                            | M ± SD                   | Category                          | M ± SD    | Category  | M ± SD     |
| Gestational Age/Trimester | -                             | -         | -                   | -                  | First Trimester                  | 1.14 ± .33 | Second Trimester<br>Third Trimester | .47 ± .29#<br>.62 ± .47* | Married                           | .74 ± .19 | Partnered | .26 ± .26* |
| Parity                    | -                             | -         | -                   | -                  | -                                | -          | -                                   | -                        | -                                 | -         | -         | -          |
| Marital Status            | Married                       | .78 ± .21 | Single<br>Partnered | .47#<br>.10 ± .03# | -                                | -          | -                                   | -                        | -                                 | -         | -         | -          |
| Socioeconomic Status      | -                             | -         | -                   | -                  | Lower Class                      | 1.03 ± .47 | Middle Class                        | .48 ± .29*               | -                                 | -         | -         | -          |
| BMI                       | NW                            | .86 ± .06 | OW<br>OB            | .32#<br>.46 ± .02# | -                                | -          | -                                   | -                        | NW                                | .74 ± .19 | OB        | .06*       |
| Sleep Duration Guidelines | -                             | -         | -                   | -                  | -                                | -          | -                                   | -                        | -                                 | -         | -         | -          |

Note: NW = normal weight, OW/OB = overweight/obese \**p* value ≤ 0.05, #*p* value ≤ 0.01, ^trending *p* value ≤ 0.1

Table 5S. Depression Moderator Results

|                            | Sleep Quality (PSQI Global Score) |                |             |      | Sleep Quality (PSQI Item Score) |                |             |       | Sleep Quality (Other Measures)^ |                |             |     | Sleep Duration (PSQI Item Score) |                |             |        | Sleep Duration (Other Measures)# |                |             |        |
|----------------------------|-----------------------------------|----------------|-------------|------|---------------------------------|----------------|-------------|-------|---------------------------------|----------------|-------------|-----|----------------------------------|----------------|-------------|--------|----------------------------------|----------------|-------------|--------|
|                            | <i>df</i>                         | Sum of Squares | Mean Square | F    | <i>df</i>                       | Sum of Squares | Mean Square | F     | <i>df</i>                       | Sum of Squares | Mean Square | F   | <i>df</i>                        | Sum of Squares | Mean Square | F      | <i>df</i>                        | Sum of Squares | Mean Square | F      |
| Gestational Age /Trimester | 2, 36                             | .07            | .04         | .28  | 1, 1                            | .01            | .01         | .22   | 2, 3                            | .00            | .00         | .31 | -                                | -              | -           | -      | 2, 4                             | .10            | .05         | .79    |
| Parity                     | 2, 32                             | .05            | .03         | .20  | 1, 3                            | .10            | .10         | 2.97  | -                               | -              | -           | -   | 1, 1                             | .10            | .10         | 448.5* | -                                | -              | -           | -      |
| Marital Status             | 1, 40                             | .00            | .00         | .02  | 2, 3                            | .06            | .03         | .17   | -                               | -              | -           | -   | -                                | -              | -           | -      | 1, 5                             | .34            | .34         | 483.6# |
| Socioeconomic Status       | 1, 33                             | .02            | .02         | .16  | 1, 2                            | .10            | .10         | 74.6* | -                               | -              | -           | -   | -                                | -              | -           | -      | -                                | -              | -           | -      |
| BMI                        | 1, 12                             | .02            | .02         | .24  | 1, 1                            | .19            | .19         | 85.1^ | -                               | -              | -           | -   | 1, 1                             | .01            | .01         | 58.5^  | -                                | -              | -           | -      |
| Sleep Duration Guidelines  | 1, 9                              | .04            | .04         | 1.05 | 1, 2                            | .03            | .03         | .37   | -                               | -              | -           | -   | 1, 2                             | .02            | .02         | .49    | 1, 5                             | .34            | .34         | 483.6# |

Note: \**p* value ≤ 0.05, #*p* value ≤ 0.01. ^trending *p* value ≤ 0.1. ^Sleep quality (other measures) included self-reported sleep quality from sleep logs and the Basic Nordic Questionnaire. #Sleep Duration (Other Measures) included self-reported sleep duration from sleep logs and the Mindell's Sleep Questionnaire.

Table 6S. Depression Moderator Results (Means and SD)

|                            | Sleep Quality (PSQI Item Score) |            |                 |                  | Sleep Duration (PSQI Item Score) |           |                 |                 | Sleep Duration (Other Measures) <sup>#</sup> |           |                 |                  |
|----------------------------|---------------------------------|------------|-----------------|------------------|----------------------------------|-----------|-----------------|-----------------|----------------------------------------------|-----------|-----------------|------------------|
|                            | <i>Category</i>                 | M ± SD     | <i>Category</i> | M ± SD           | <i>Category</i>                  | M ± SD    | <i>Category</i> | M ± SD          | <i>Category</i>                              | M ± SD    | <i>Category</i> | M ± SD           |
| Gestational Age /Trimester | -                               | -          | -               | -                | -                                | -         | -               | -               | -                                            | -         | -               | -                |
| Parity                     | -                               | -          | -               | -                | Multiparous                      | .46 ± .02 | Nulliparous     | .08*            | -                                            | -         | -               | -                |
| Marital Status             | -                               | -          | -               | -                | -                                | -         | -               | -               | Married                                      | .75 ± .03 | Partnered       | .12 <sup>#</sup> |
| Socioeconomic Status       | Upper-class                     | 1.05 ± .02 | Lower-class     | .73 ± .05*       | -                                | -         | -               | -               | -                                            | -         | -               | -                |
| BMI                        | OB                              | .19        | OW              | .73 <sup>^</sup> | OB                               | .46       | OW              | 32 <sup>^</sup> | -                                            | -         | -               | -                |
| Sleep Duration Guidelines  | -                               | -          | -               | -                | -                                | -         | -               | -               | 7-9 hours/night                              | .75 ± .03 | > 9 hours/night | .12 <sup>#</sup> |

Note: OW/OB = overweight/obese \**p* value ≤ 0.05, #*p* value ≤ 0.01, <sup>^</sup>trending *p* value ≤ 0.1. <sup>#</sup>Sleep Duration (Other Measures) included self-reported sleep duration from sleep logs and the Mindell's Sleep Questionnaire.

Table 7S. Anxiety/Stress Moderator Results

|                           | Sleep Quality (PSQI Global Score) and Anxiety/Stress |                |             |                    | Sleep Quality (PSQI Global Score) and Anxiety/Stress |           |                 |                        |
|---------------------------|------------------------------------------------------|----------------|-------------|--------------------|------------------------------------------------------|-----------|-----------------|------------------------|
|                           | <i>df</i>                                            | Sum of Squares | Mean Square | F                  | <i>Category</i>                                      | M ± SD    | <i>Category</i> | M ± SD                 |
| Gestational Age/Trimester | 2, 30                                                | .431           | .215        | 1.979              | -                                                    | -         | -               | -                      |
| Parity                    | 2, 24                                                | .923           | .462        | 7.564 <sup>#</sup> | Multiparous                                          | .86 ± .34 | Primiparous     | .46 ± .20 <sup>#</sup> |
| Marital Status            | 1, 33                                                | .052           | .052        | .461               | -                                                    | -         | -               | -                      |
| Socioeconomic Status      | 1, 30                                                | .447           | .447        | 4.598*             | Upper-class                                          | .82 ± .35 | Middle-class    | .54 ± .30*             |
| BMI                       | -                                                    | -              | -           | -                  | -                                                    | -         | -               | -                      |
| Sleep Duration            | 1, 10                                                | .039           | .039        | 1.616              | -                                                    | -         | -               | -                      |
